# Supplementary material
Source: publisher figshare collection journal article supplement (https://tandf.figshare.com/articles/dataset/_/9357047)

Figure S3

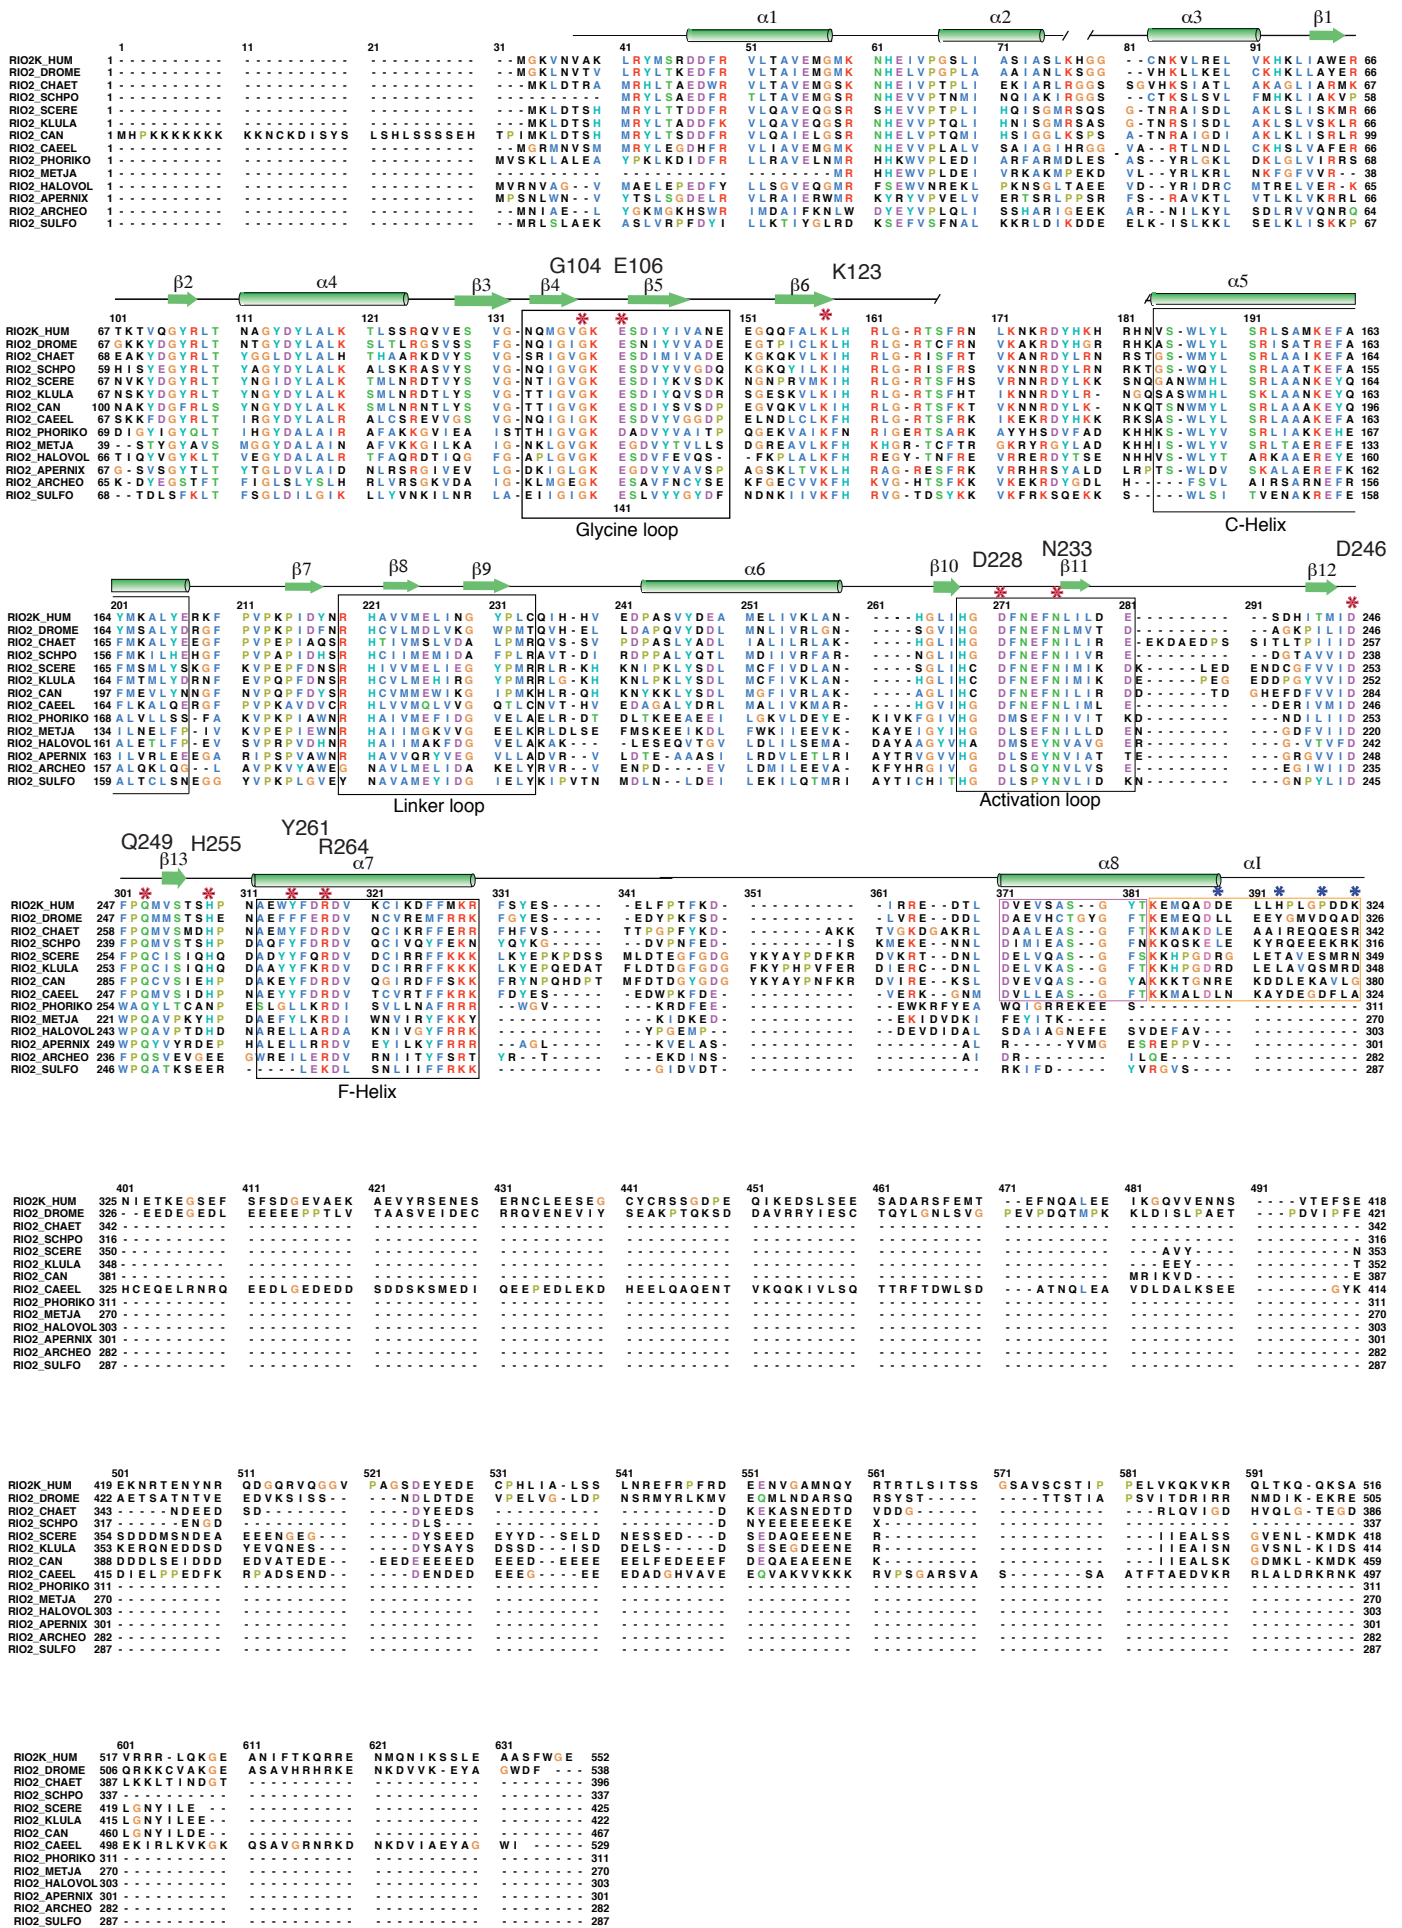

Supplement: Supplementary file 1 [file 1]

Figure S2

A

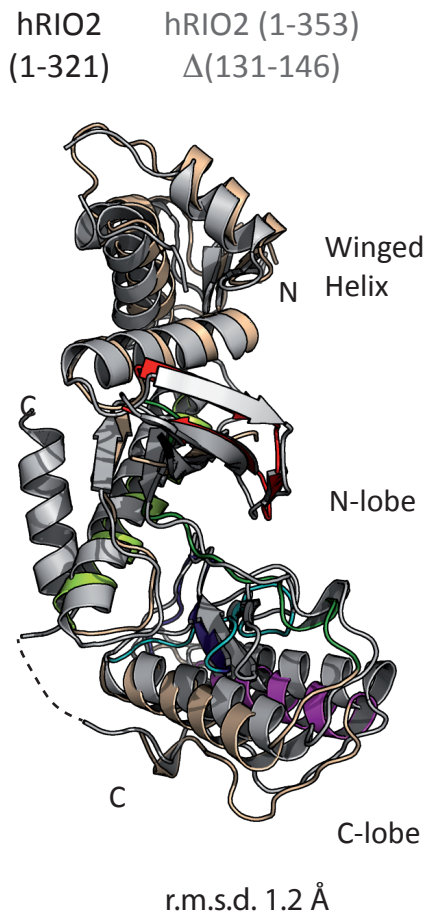

B

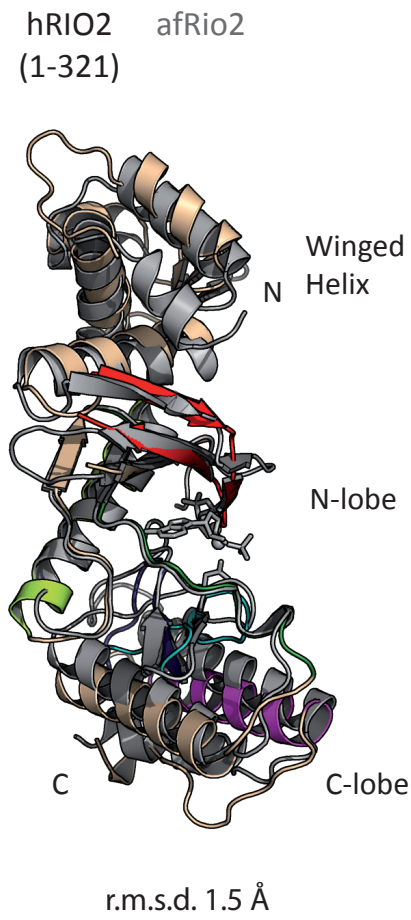

C

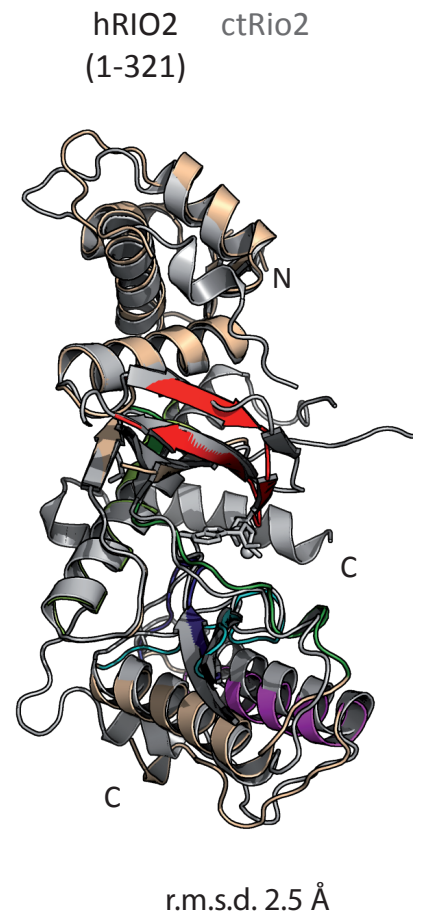

Supplement: Supplementary file 2 [file 1]

Figure S1

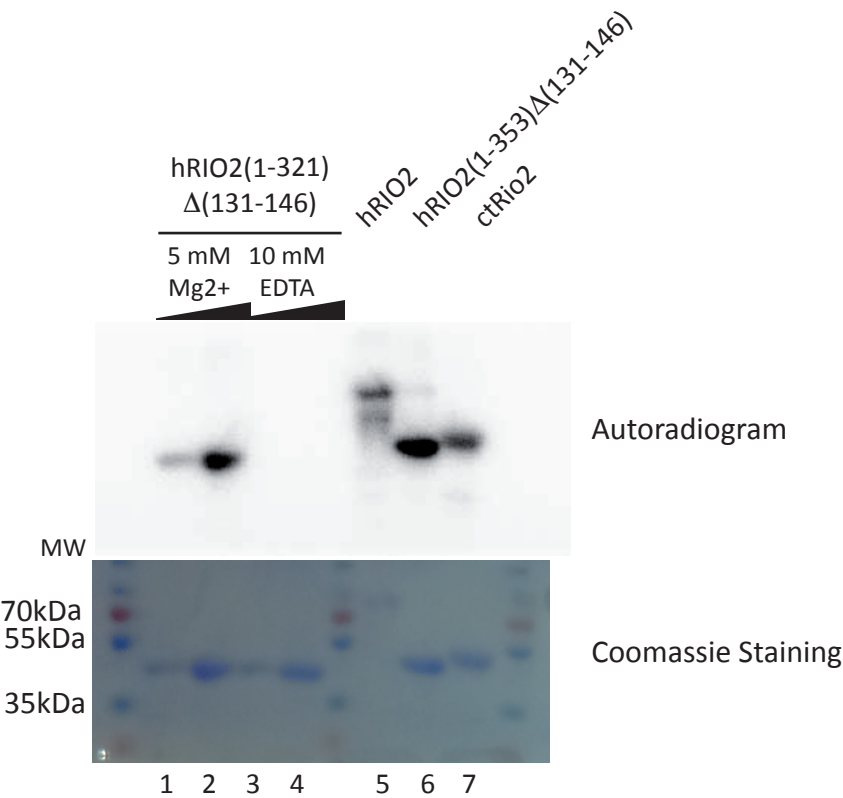

Supplement: Supplementary file 3 [file 1]
